# Supplementary material for: Interferon-Induced Transmembrane Protein 3 Is a Virus-Associated Protein Which Suppresses Porcine Reproductive and Respiratory Syndrome Virus Replication by Blocking Viral Membrane Fusion
Source: PubMed Central journal article supplement (PMC7925183; doi:10.1128/jvi.01350-20), 2020-11-23
Supplement: JVI.01350-20-s0003.pdf [file JVI.01350-20-s0003.pdf]

**Movie S1 Example of PRRSV intercellular transmission when Marc-145-Vector cells are used as both donor cells and target cells.** Marc-145-Vector cells were infected with 0.1 MOI of GFP-PRRSV for 48 h. Cells were digested and counted as donor cells.  $5 \times 10^5$  donor cells (green) were co-cultured with  $5 \times 10^5$  Marc-145-Vector-RFP cells (red, target cells) for 2 h at  $37^\circ\text{C}$ , followed by sorting using flow cytometry. About  $4 \times 10^5$  target cells were plated in 35 mm culture dishes and continued to incubate for 12 h at  $37^\circ\text{C}$ , then time-lapse video imaging was conducted. Transmission and fluorescence images were taken every 5 min up to 60 hpi at  $37^\circ\text{C}$ , 5%  $\text{CO}_2$  using a Nikon Biostation IMQ.

**Movie S2 Example of PRRSV intercellular transmission when Marc-145-IFITM3-flag cells are used as both donor cells and target cells.** Marc-145-IFITM3-flag-RFP cells were infected with 0.1 MOI of GFP-PRRSV for 48 h. Cells were digested and counted as donor cells.  $5 \times 10^5$  donor cells (green) were cocultured with  $5 \times 10^5$  Marc-145-IFITM3-flag-RFP cells (red, target cells) for 2 h at  $37^\circ\text{C}$ , followed by sorting using flow cytometry. About  $4 \times 10^5$  target cells were plated in 35 mm culture dishes and continued to incubate for 12 h at  $37^\circ\text{C}$ , then time-lapse video imaging was conducted. Transmission and fluorescence images were taken every 5 min up to 60 hpi at  $37^\circ\text{C}$ , 5%  $\text{CO}_2$  using a Nikon Biostation IMQ.
